# Supplementary material for: The role of GABA in semantic memory and its neuroplasticity
Source: Research Square preprint supplement (doi:10.21203/rs.3.rs-3026480/v2), 2024-11-22
Supplement: Supplementary file 1 [file c7cb89c74dad88d2e71b7032.docx]

**Supplementary information**

Supplementary Table 1

Supplementary Figure 1

Supplementary Figure 2

Supplementary Table 1

|  | ATL VOI | | Vertex VOI | |
| --- | --- | --- | --- | --- |
|  | PRE | POST | PRE | POST |
| ATL stimulation | 0.50 ± 0.03 | 0.47 ± 0.03 | 0.24 ± 0.03 | 0.22 ± 0.03 |
| Vertex stimulation | 0.47 ± 0.03 | 0.49 ± 0.02 | 0.29 ± 0.03 | 0.27 ± 0.04 |

Table S1. The summary of tissue type within MRS VOIs. Mean ± SE

Supplementary Figure 1

*cTBS effects on Glx*

We conducted a 2 x 2 x 2 repeated measure of ANVOVA with a stimulation (ATL vs. vertex), session (PRE vs. POST), and VOI (ATL vs. vertex) as within subject factors. The results demonstrated a significant main effect of VOI (F1, 16 = 41.56, p < 0.001) (Fig. 1). The other effects did not reach a significant level.


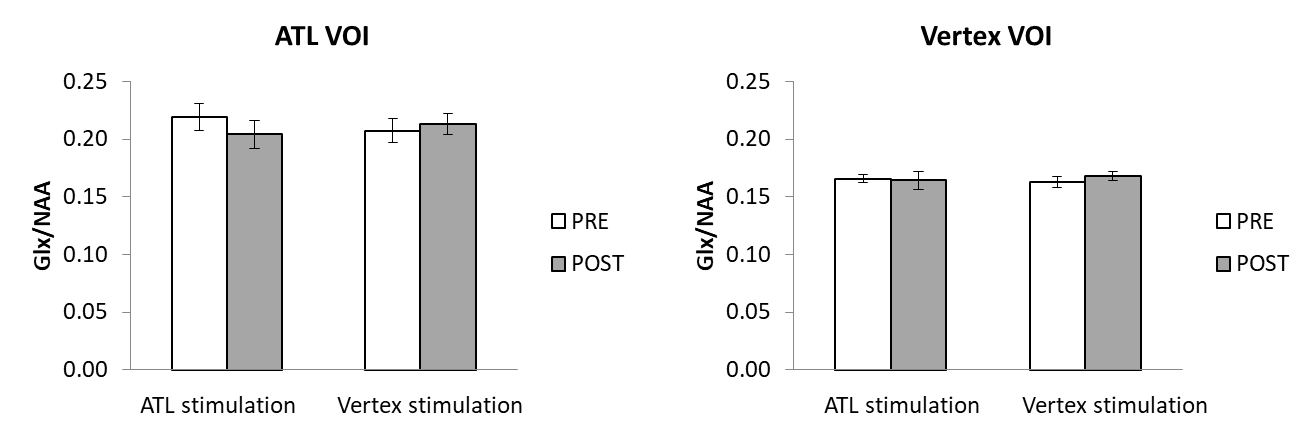


Figure S1. The effects of cTBS in Glx.

Supplementary Figure 2


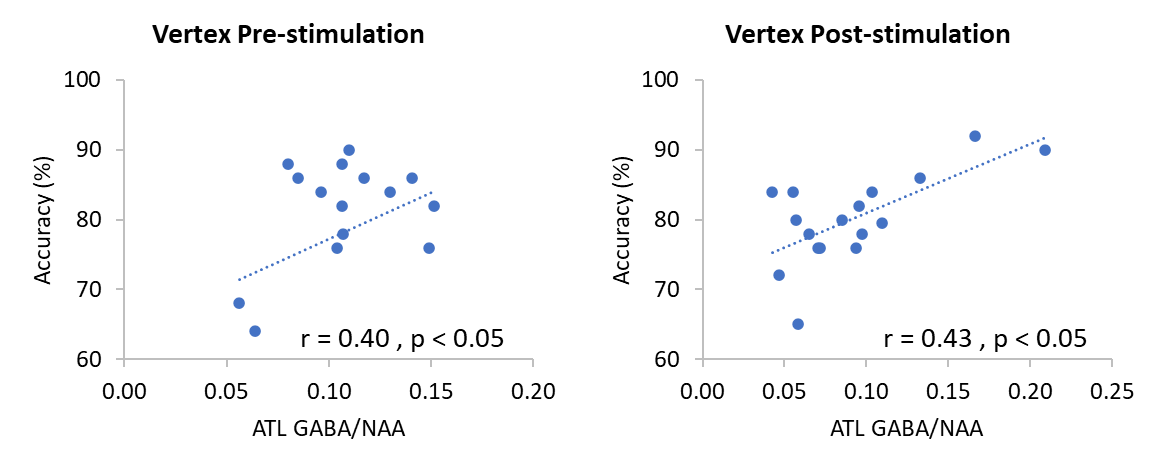


Figure S2. The relationship between the ATL GABA levels and semantic task performance in the vertex stimulation.
